# Supplementary material
Source: Springer Nature journal article supplement (https://www.springermedizin.de/resource/supplementary/12913_2012_2365_MOESM2_ESM.pdf/9530542)

**Figure 1: Four described models of shared care**

**(a) Surgical oncologist and dermatologist**

*Alternating visits with surgical oncologist and dermatologist (at melanoma unit or local to patient), with shared arrangement ongoing for variable duration (e.g. 2-5 years).*

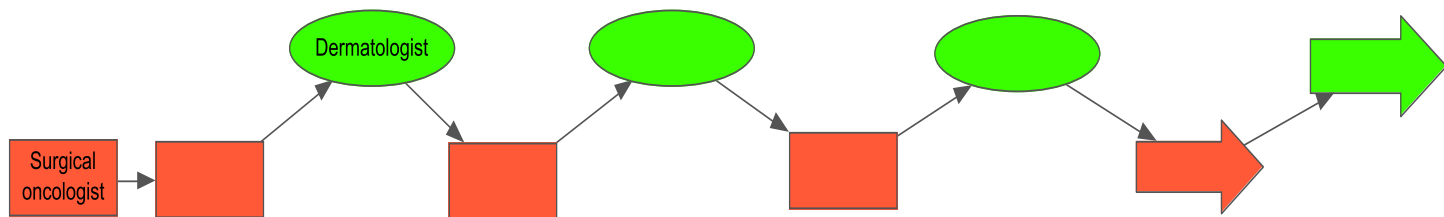

**(b) Dermatologist and local GP**

*Dermatologist (at melanoma unit or local to patient) conducts ongoing follow-up; they may also share care with the patient's local / referring doctor (e.g. GP or skin cancer clinic).*

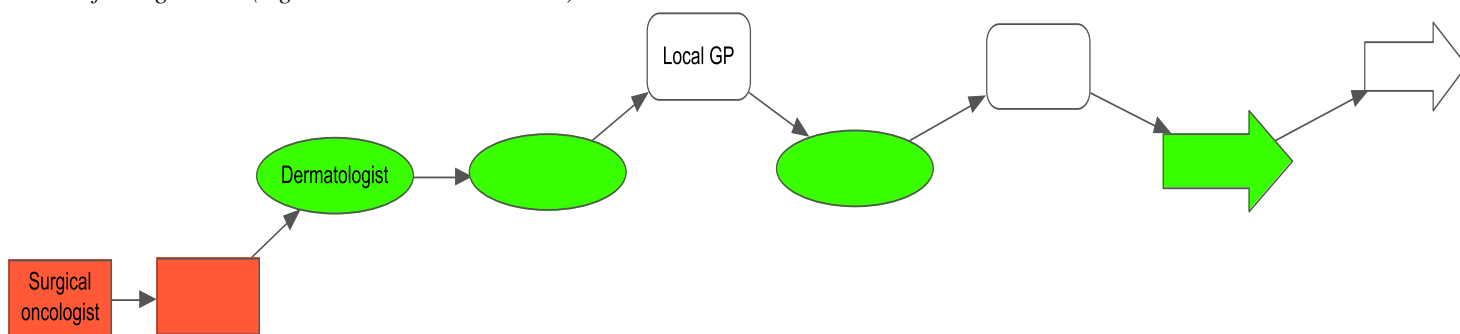

**(c) Surgical oncologist and local GP**

*Alternating visits with surgical oncologist and patient's local / referring doctor (e.g. GP or skin cancer clinic), with variable duration of shared arrangements (from a few years to lifelong).*

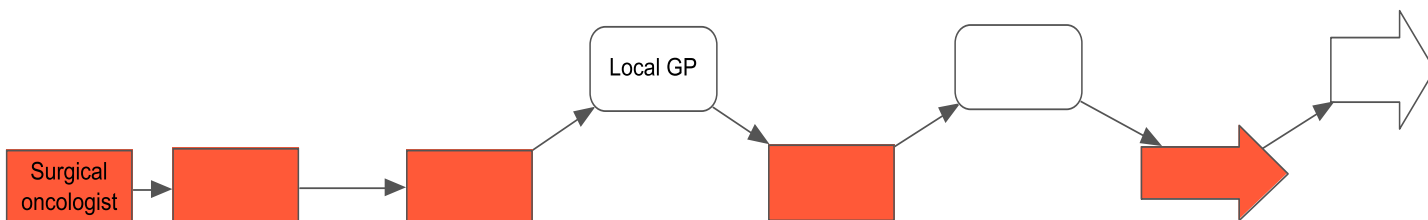

**(d) Melanoma unit GP and local GP**

*Surgical oncologist referral to 'in-house' melanoma unit GP for ongoing follow-up; the latter may then also share care with patients local / referring doctor (e.g. family GP or skin cancer clinic)*

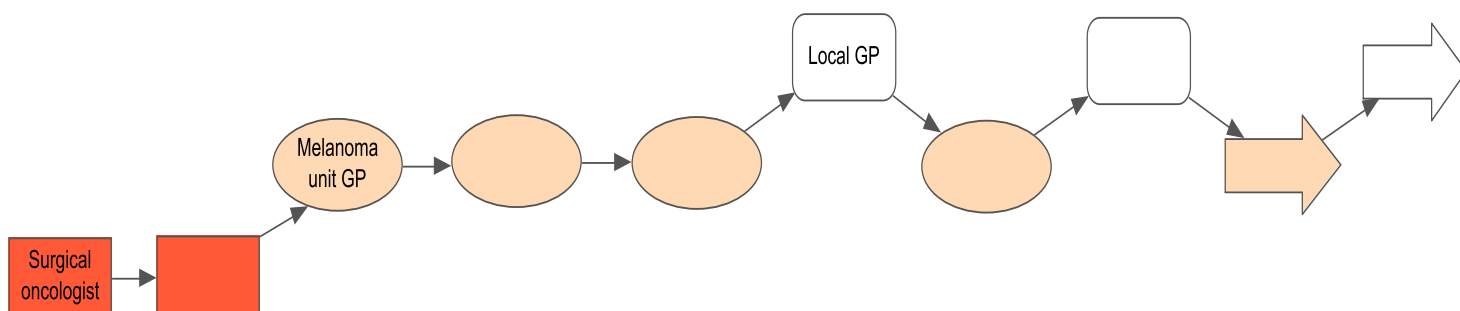

Supplement: MOESM2 [file 9530542]
